# Supplementary material
Source: PubMed Central journal article supplement (PMC5310646)
Supplement: NIHMS826189-supplement-1.pdf [file NIHMS826189-supplement-1.pdf]

Supplemental Figures

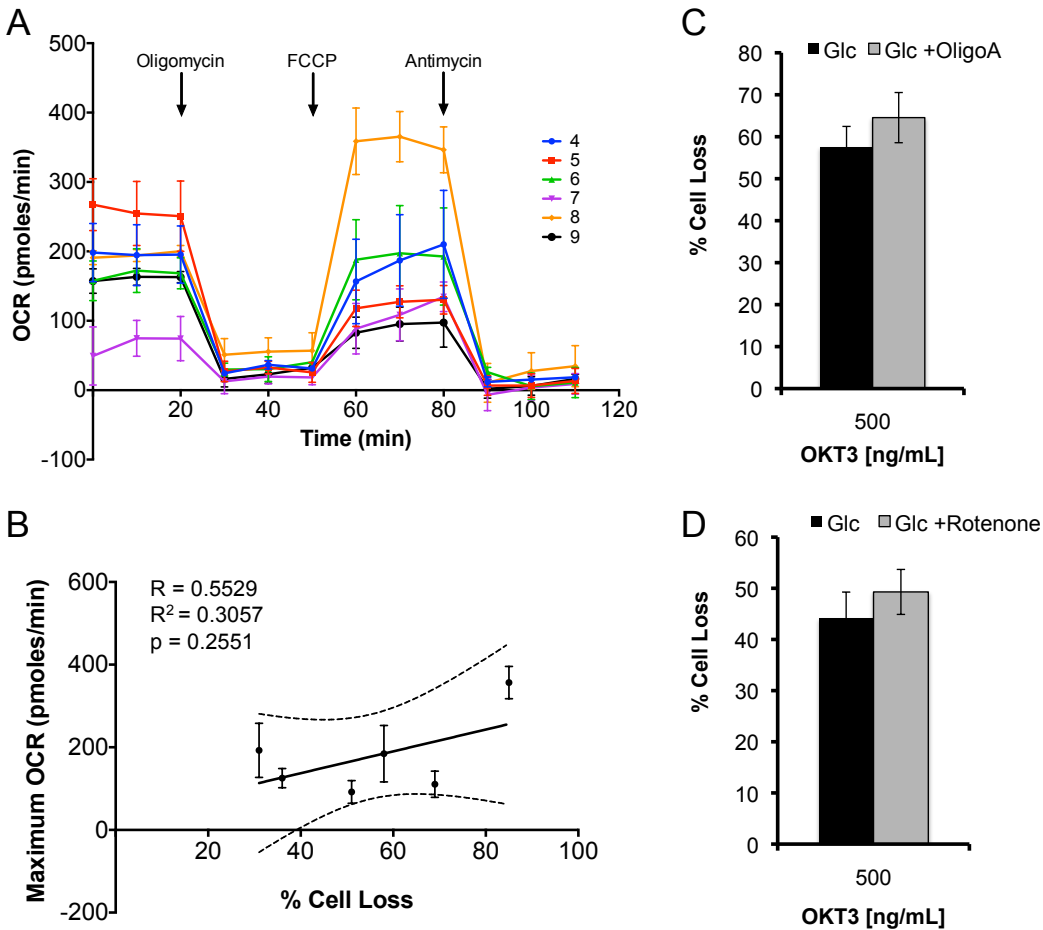

**Figure S1. Oxidative phosphorylation does not correlate with decreased RICD sensitivity.** **(A)** Seahorse analysis of oxygen consumption rate (OCR) for 6 independent donors. **(B)** Linear regression analysis comparing maximum % cell loss versus maximum OCR for 6 independent donors, including 95% confidence interval (dashed line). Pearson correlation  $R^2=0.3057$  and  $p=0.2551$ . **(C,D)** Glc T cells were restimulated with 500 ng/ml OKT3 for 24 hrs  $\pm$  1 mM oligomycin A (C) or  $\pm$  5 mM rotenone (D) pre-treatment, and analyzed for RICD as in Fig 1D. Data represent % cell loss (avg  $\pm$  SEM) for 4 individual donors. Treatments were compared by Students T-test: Glc-Glc+OligoA  $p=0.3375$ , Glc-Glc+rotenone  $p=0.4139$ .

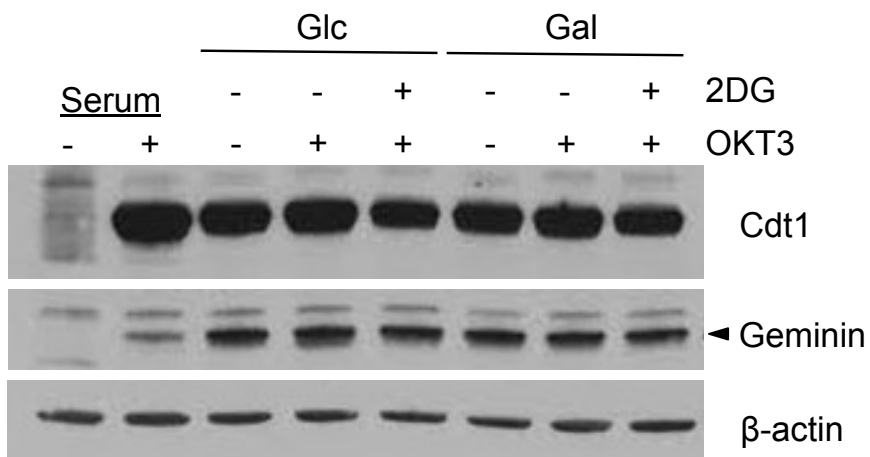

**Figure S2. Cell cycle check point proteins are equally expressed. (A)** Whole cell lysates (WCL) from Glc and Gal T cells at baseline and after 4 hours of restimulation  $\pm$  2-DG were separated by SDS-PAGE and immunoblotted for the indicated proteins.  $\beta$ -actin serves as a loading control. Data are representative of 2 independent experiments using different donors.
